# Supplementary material
Source: publisher figshare collection journal article supplement (https://acs.figshare.com/ndownloader/files/3701542)
Supplement: Supplementary file 1 [file 3701542]

## Supporting Information

### **Ternary platinum-copper-nickel nanoparticles anchored to hierarchical carbon supports as free-standing hydrogen evolution electrodes**

**Yi Shen<sup>\*1,2</sup>, Aik Chong Lua<sup>2</sup>, Jingyu Xi<sup>\*3</sup> and Xinpeng Qiu<sup>\*3,4</sup>**

<sup>1</sup> School of Food Science and Technology, South China University of Technology, Guangzhou, 510640, China. Tel. & Fax: +86 2087113843; email: [feyshen@scut.edu.cn](mailto:feyshen@scut.edu.cn) (Y. Shen)

<sup>2</sup> School of Mechanical and Aerospace Engineering, Nanyang Technological University, 50 Nanyang Avenue, 639798, Republic of Singapore. Tel.: +65 67905535.

<sup>3</sup> Institute of Green Chemistry and Energy, Graduate School at Shenzhen, Tsinghua University, Shenzhen 518055, China. Tel.: +86 75526036436; Fax: +86 75526036181; email: [xijy@tsinghua.edu.cn](mailto:xijy@tsinghua.edu.cn) (J. Xi)

<sup>4</sup> Key Lab of Organic Optoelectronics and Molecular Engineering, Department of Chemistry, Tsinghua University, Beijing 100084, China. Tel. & Fax: +86 1062794234; email: [qiuxp@tsinghua.edu.cn](mailto:qiuxp@tsinghua.edu.cn) (X. Qiu)

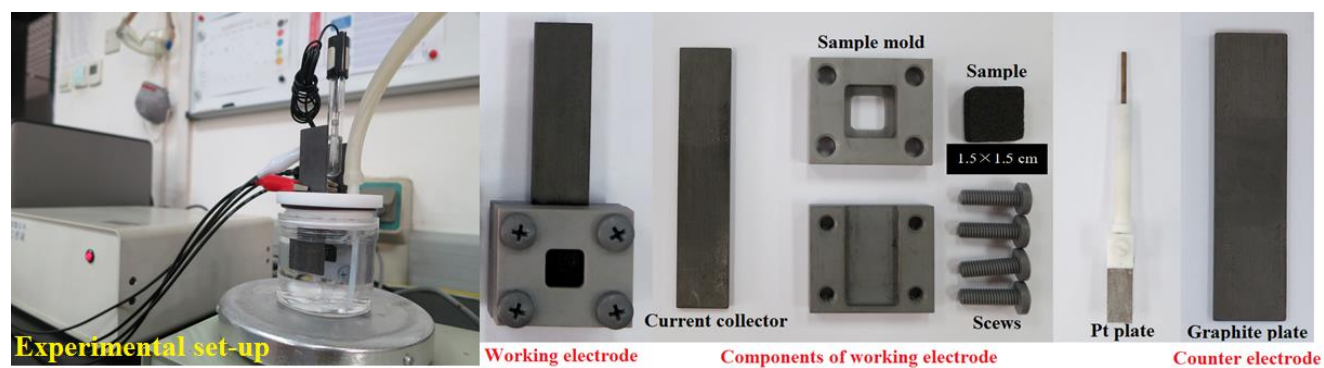

**Figure S1** Experimental set-up of electrochemical measurements.

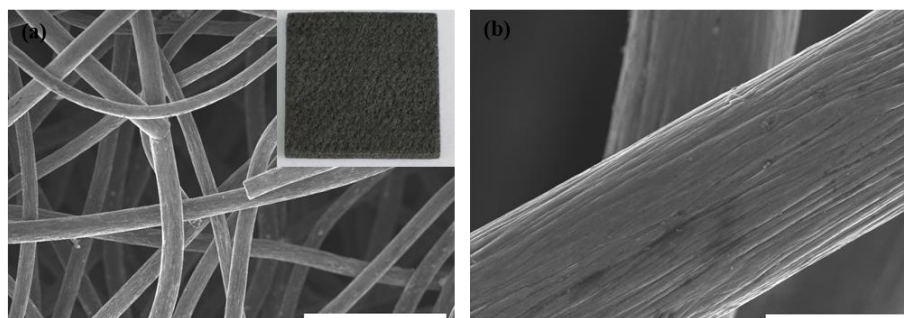

**Figure S2** FESEM micrographs of pristine carbon felt (Inset in (a) is an optical image of a piece of  $5 \times 5 \times 0.5$  cm carbon felt sheet.) Scale bars, 100  $\mu\text{m}$  (a), 10  $\mu\text{m}$  (b)

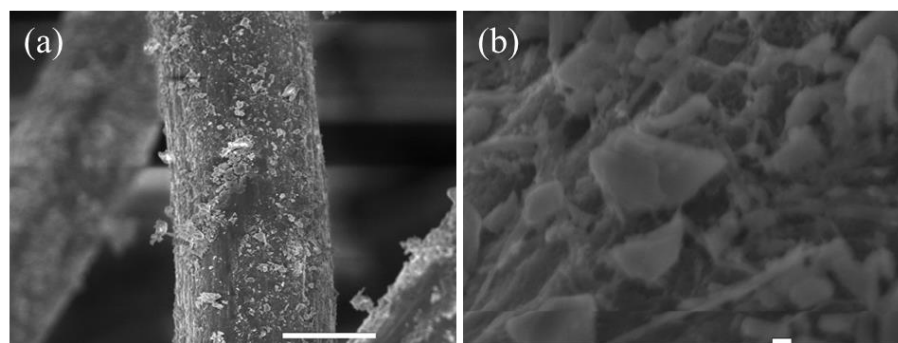

**Figure S3** FESEM micrographs of nickel-copper oxalates decorated carbon felt. Scale bars, 10  $\mu\text{m}$  (a), 100 nm (b).

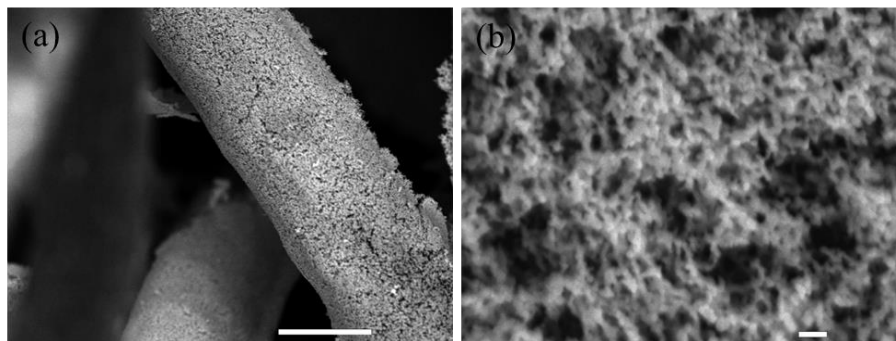

**Figure S4** FESEM micrographs of metallic nickel-copper decorated carbon felt. Scale bars, 10  $\mu\text{m}$  (a), 100 nm (b).

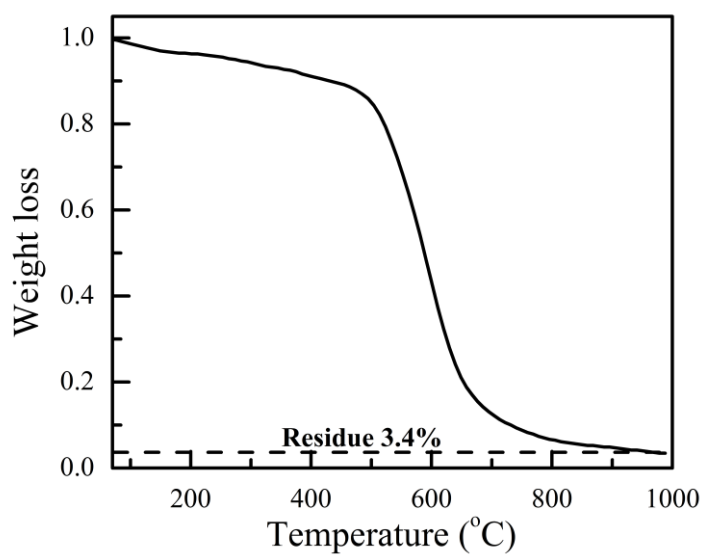

**Figure S5** Thermogravimetric curves of  $\text{Pt}_{42}\text{Cu}_{57}\text{Ni}_1/\text{CNF}@CF$ .

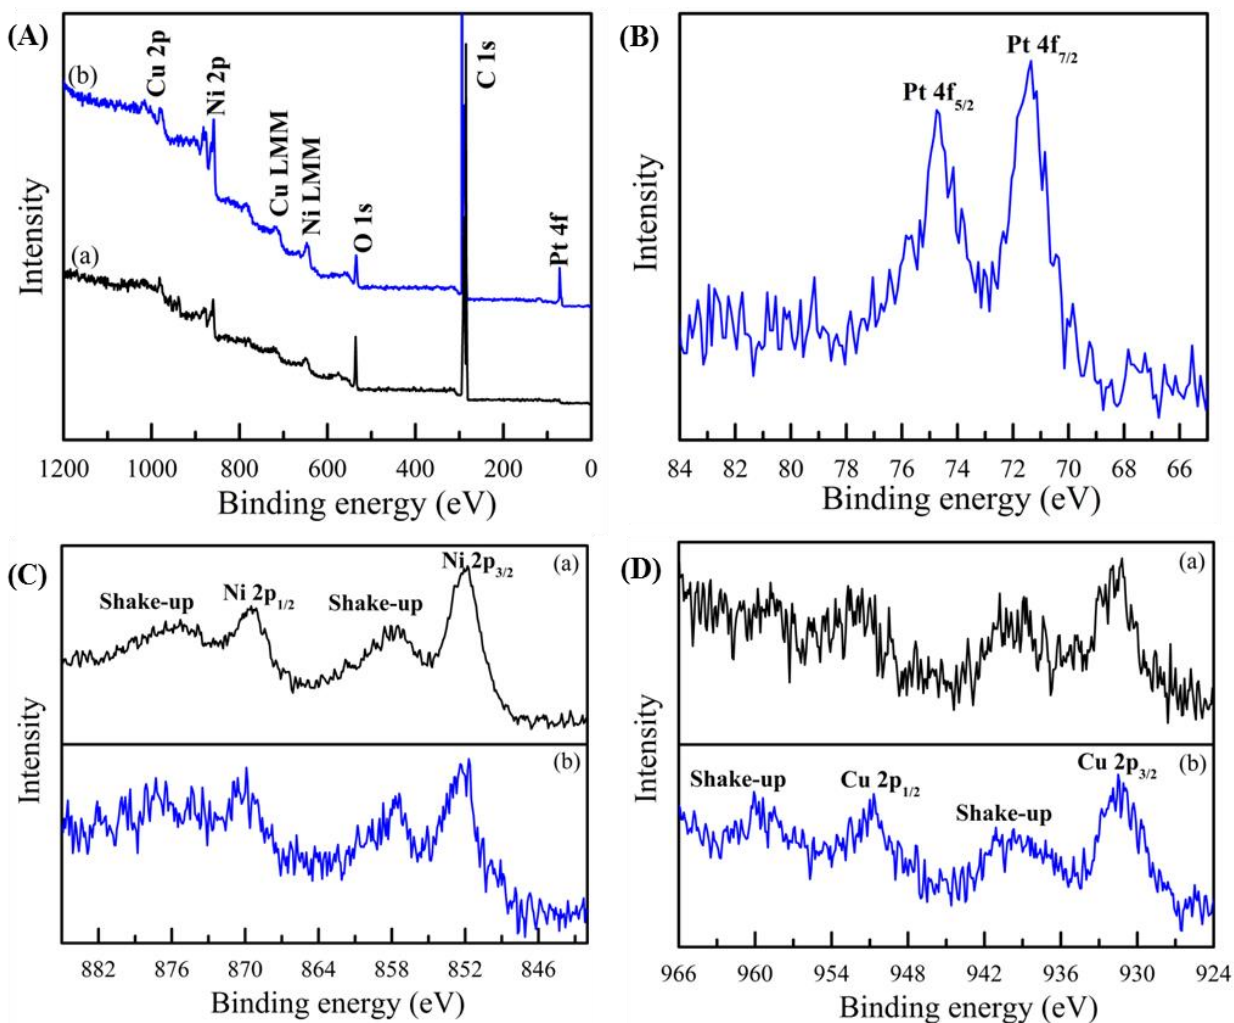

**Figure S6** (A) Survey spectra, XPS profiles of (B) Pt 4f, (C) Ni 2p and (D) Cu 2p in (a)  $\text{Ni}_{65}\text{Cu}_{35}/\text{CNF}@\text{CF}$  and (b)  $\text{Pt}_{13}\text{Cu}_{73}\text{Ni}_{14}/\text{CNF}@\text{CF}$

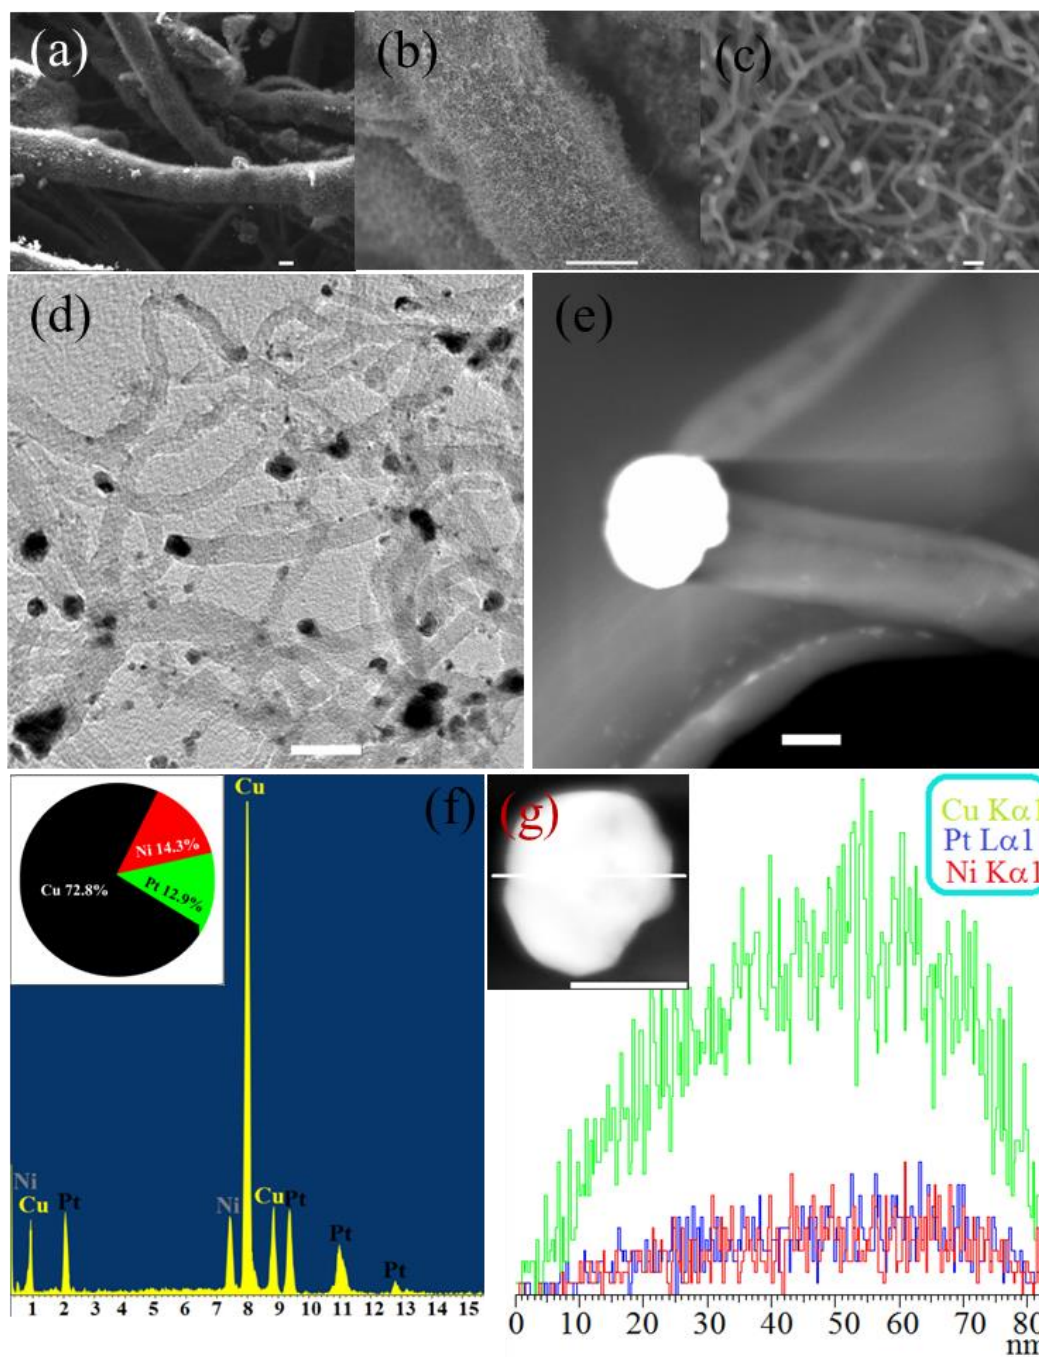

**Figure S7** (a)-(c) FESEM micrographs of Pt<sub>13</sub>Cu<sub>73</sub>Ni<sub>14</sub>/CNF@CF, (d) TEM, (e) HAADF-STEM micrographs of isolated Pt<sub>13</sub>Cu<sub>73</sub>Ni<sub>14</sub>/CNF@CF, (f) EDS profile of Pt<sub>13</sub>Cu<sub>73</sub>Ni<sub>14</sub> NPs (inset in (f), atomic composition of Pt<sub>13</sub>Cu<sub>73</sub>Ni<sub>14</sub> NPs), (g) line scan and elemental distribution of a Pt<sub>13</sub>Cu<sub>73</sub>Ni<sub>14</sub> NP. Scale bars, 10 μm (a, b), 100 nm (c), 200 nm (d), 50 nm (e) and (g)



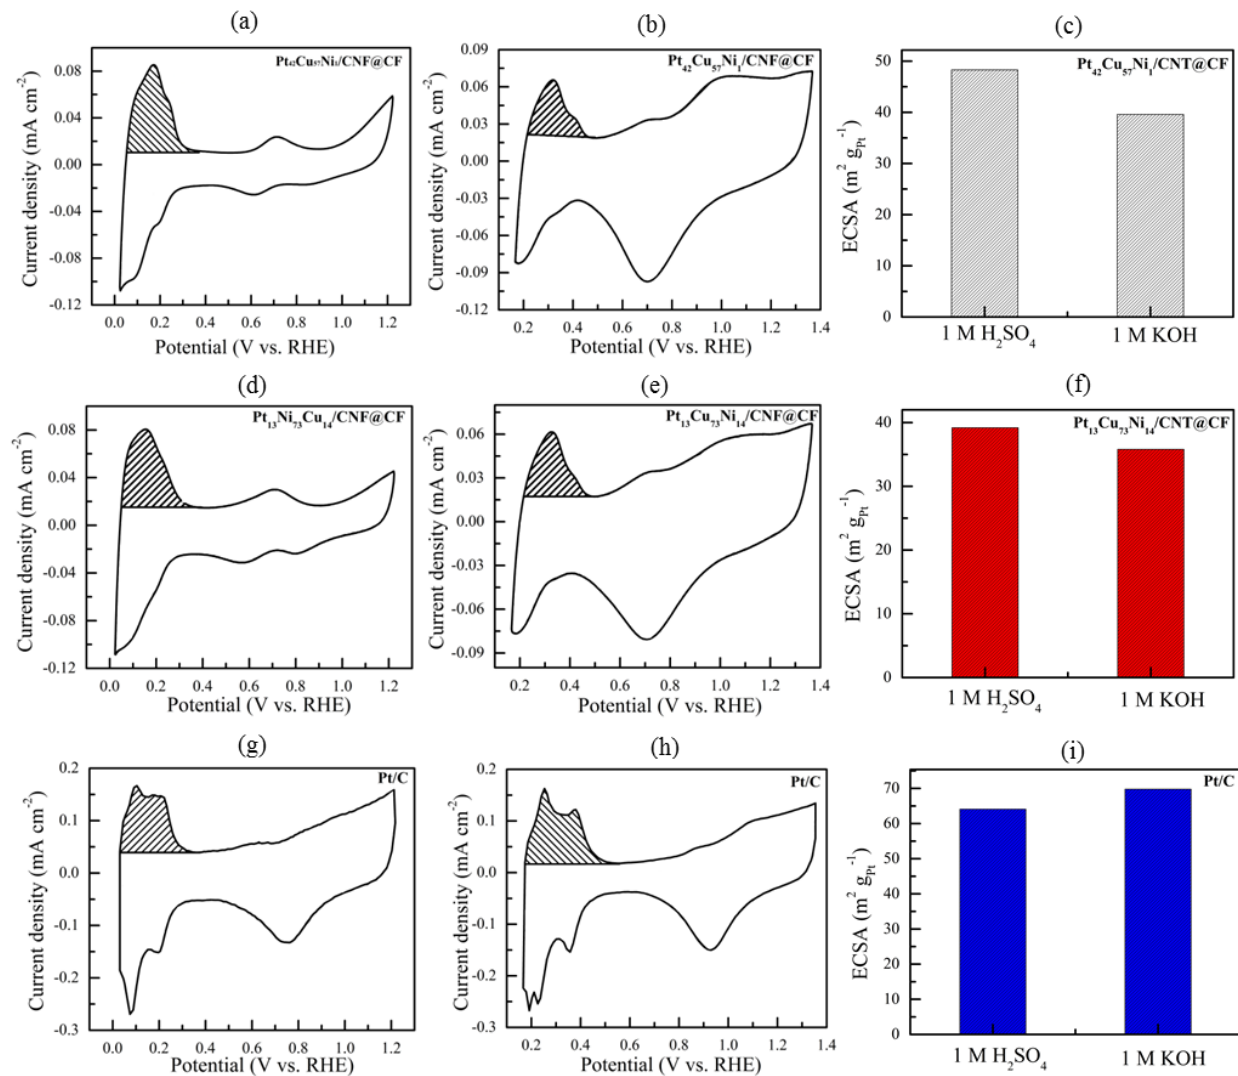

**Figure S8** (a) and (b) Cyclic voltammetry curves of  $\text{Pt}_{42}\text{Cu}_{57}\text{Ni}_1/\text{CNF}@CF$  in 1 M  $\text{H}_2\text{SO}_4$  and 1 M KOH with a scan rate of  $50 \text{ mV s}^{-1}$ , respectively, and (c) ECSA values of  $\text{Pt}_{42}\text{Cu}_{57}\text{Ni}_1/\text{CNF}@CF$  in 1 M  $\text{H}_2\text{SO}_4$  and 1 M KOH; (d) and (e) cyclic voltammetry curves of  $\text{Pt}_{13}\text{Cu}_{73}\text{Ni}_{14}/\text{CNF}@CF$  in 1 M  $\text{H}_2\text{SO}_4$  and 1 M KOH with a scan rate of  $50 \text{ mV s}^{-1}$ , respectively, and (f) ECSA values of  $\text{Pt}_{13}\text{Cu}_{73}\text{Ni}_{14}/\text{CNF}@CF$  in 1 M  $\text{H}_2\text{SO}_4$  and 1 M KOH; (g) and (h) cyclic voltammetry curves of Pt/C in 1 M  $\text{H}_2\text{SO}_4$  and 1 M KOH with a scan rate of  $50 \text{ mV s}^{-1}$ , respectively, and (i) ECSA values of Pt/C in 1 M  $\text{H}_2\text{SO}_4$  and 1 M KOH.

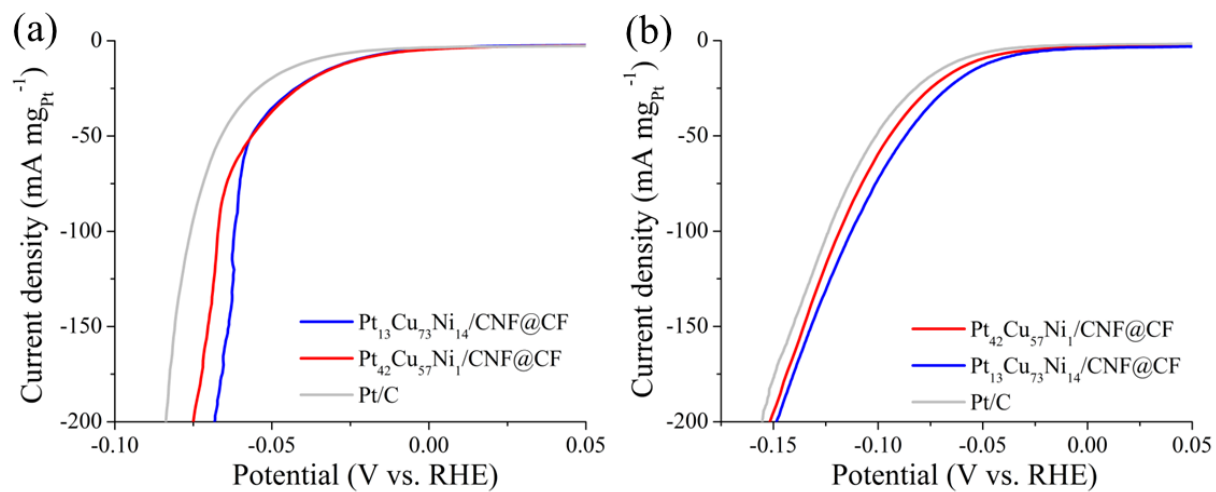

**Figure S9** (a) and (b) Pt-mass normalized polarization curves of catalysts in 1 M H<sub>2</sub>SO<sub>4</sub> and 1 M KOH, respectively.

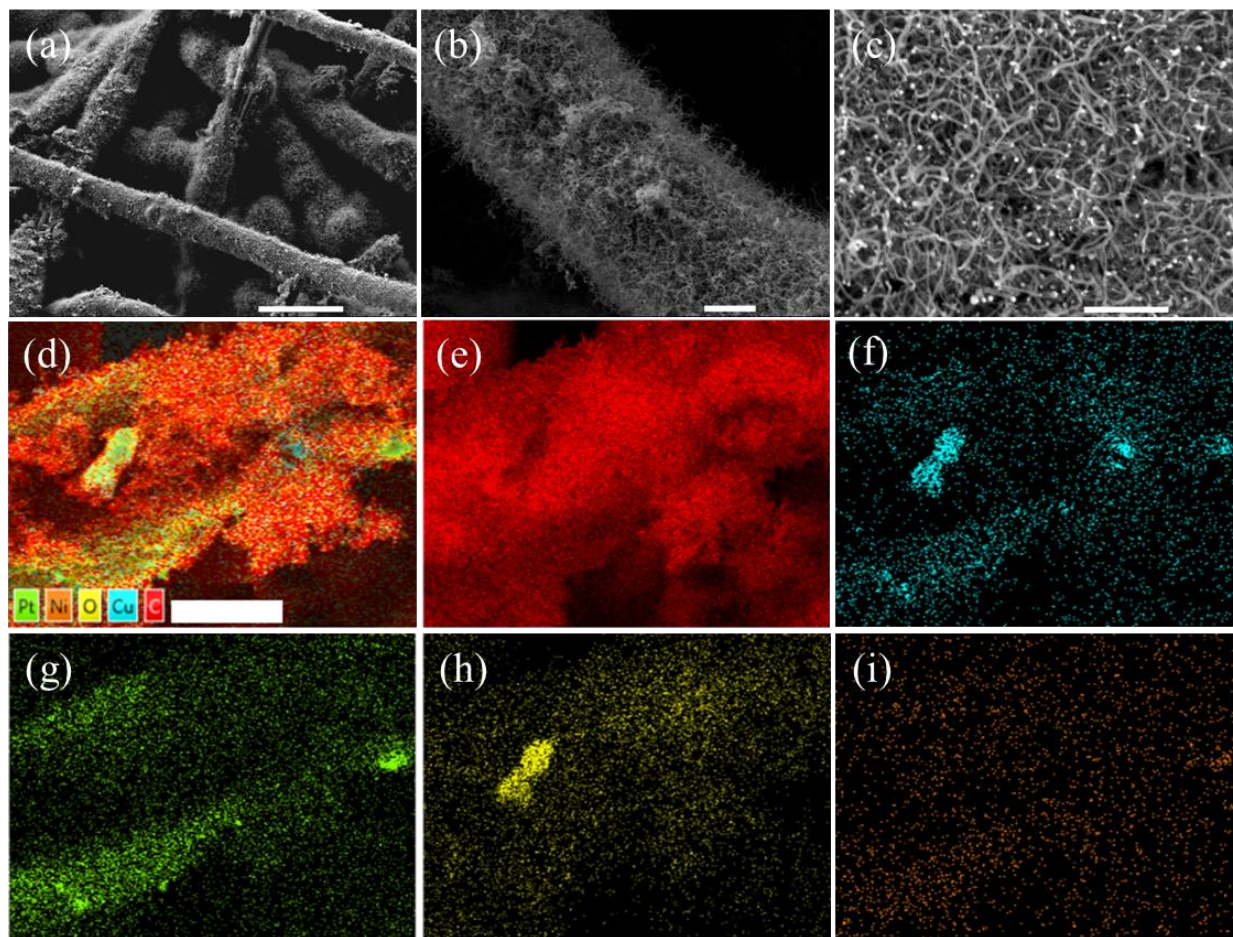

**Figure S10** (a)-(c) FESEM micrographs of spent  $\text{Pt}_{13}\text{Cu}_{73}\text{Ni}_{14}/\text{CNF}@\text{CF}$  in 1 M  $\text{H}_2\text{SO}_4$ , (d) overall EDS micrograph, (e)-(i) elemental mapping micrographs of carbon, copper, platinum, oxygen, and nickel, respectively. Scale bar, 10  $\mu\text{m}$ .



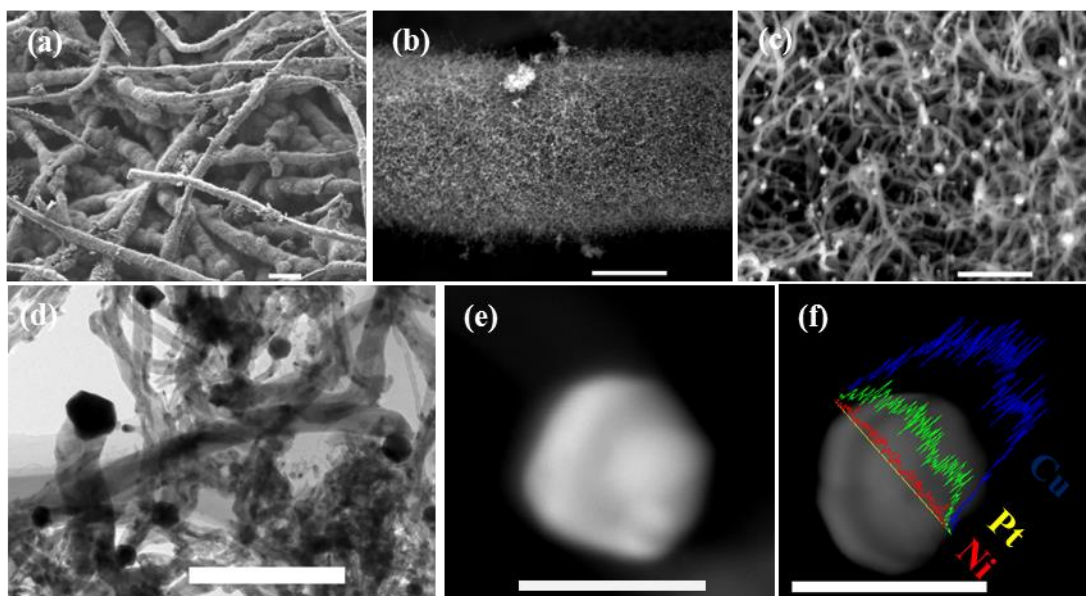

**Figure S11** (a)-(c) FESEM micrographs of spent  $\text{Pt}_{42}\text{Cu}_{57}\text{Ni}_1/\text{CNF@CF}$  in 1 M  $\text{H}_2\text{SO}_4$ , (d) TEM micrograph of isolated  $\text{Pt}_{42}\text{Cu}_{57}\text{Ni}_1/\text{CNF@CF}$ , (e) high-resolution HAADF-STEM micrograph of a typical  $\text{Pt}_{42}\text{Cu}_{57}\text{Ni}_1$  NP, (f) line scan and elemental distribution of a  $\text{Pt}_{42}\text{Cu}_{57}\text{Ni}_1$  NP. Scale bars, 100  $\mu\text{m}$  (a), 10  $\mu\text{m}$  (b), 1  $\mu\text{m}$  (c) and (d), 100 nm (e) and (f)
